# Supplementary material for: Quantifying local ecological knowledge to model historical abundance of long-lived, heavily-exploited fauna
Source: PeerJ journal article supplement (doi:10.7717/peerj.9494), 2020-07-20

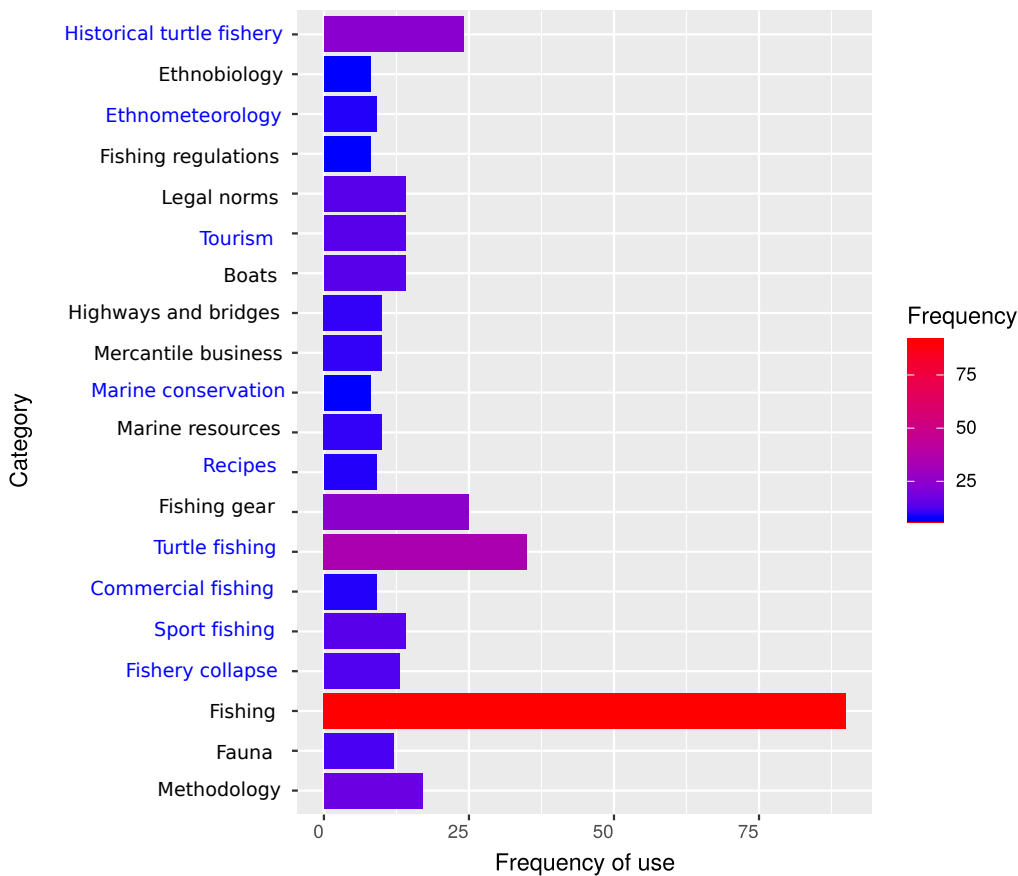

Supplement: figureS2.pdf [file figureS2.pdf]
